# Supplementary material for: Prognostic Impact of Coronary Flow Reserve in Patients With CKD
Source: PubMed Central journal article supplement — Kidney Int Rep. 2022 Oct 8;8(1):64–74. doi: 10.1016/j.ekir.2022.10.003 (PMC9832048; doi:10.1016/j.ekir.2022.10.003), 2022-10-08
Supplement: mmc1.pdf [file mmc1.pdf]

## **Supplementary Material**

### **Prognostic Impact of Coronary Flow Reserve in Patients with Chronic Kidney Disease**

Sugeon Park, MD, Seung Hun Lee, MD, PhD, Doosup Shin, MD, David Hong, MD, Ki Hong Choi, MD, PhD,

Joo Myung Lee, MD, MPH, PhD

#### **Table of Contents**

- **Supplementary Tables**
- **Supplementary Figure Legends and Figures**

## Supplementary Tables

**Table S1. Candidate Variables for Multivariable Analyses**

---

|                                                 |
|-------------------------------------------------|
| <b>Age</b>                                      |
| <b>Female</b>                                   |
| <b>Body mass index</b>                          |
| <b>Hypertension</b>                             |
| <b>Diabetes mellitus</b>                        |
| <b>Hyperlipidemia</b>                           |
| <b>Current smoking</b>                          |
| <b>Family history of cardiovascular disease</b> |
| <b>Chronic kidney disease</b>                   |
| <b>Ejection fraction</b>                        |
| <b>LA volume index</b>                          |
| <b>LVMI</b>                                     |
| <b>E/e'</b>                                     |
| <b>RV systolic pressure</b>                     |
| <b>Angiographic disease extent</b>              |
| <b>Diameter stenosis</b>                        |
| <b>SYNTAX score</b>                             |
| <b>CFR</b>                                      |
| <b>IMR</b>                                      |

---

Abbreviations: CFR, coronary flow reserve; IMR, index of microcirculatory resistance; LA, left atrium; LVMI, left ventricular mass index; RV, right ventricle; SYNTAX, Synergy Between PCI With Taxus and Cardiac Surgery.

**Table S2. Baseline Characteristics According to the Presence of Chronic Kidney Disease and CFR**

| Variables                                | Total                    | CFR >2.0<br>No CKD      | CFR >2.0<br>CKD            | CFR ≤2.0<br>No CKD        | CFR ≤2.0<br>CKD            | P value |
|------------------------------------------|--------------------------|-------------------------|----------------------------|---------------------------|----------------------------|---------|
|                                          | N=351                    | N=226                   | N=27                       | N=83                      | N=15                       |         |
| Age, years                               | 59.8 ± 13.7              | 58.8 ± 13.5             | 61.0 ± 9.6                 | 62.1 ± 15.34              | 59.6 ± 13.7                | 0.343   |
| Female                                   | 103 (29.3%)              | 64 (28.3%)              | 3 (11.1%)                  | 32 (38.6%)                | 4 (26.7%)                  | 0.039   |
| Body mass index, kg/m <sup>2</sup>       | 23.5 ± 3.7               | 23.8 ± 3.7              | 22.1 ± 3.5                 | 23.0 ± 3.7                | 23.3 ± 3.7                 | 0.081   |
| Hypertension                             | 209 (59.5%)              | 128 (56.6%)             | 21 (77.8%)                 | 48 (57.8%)                | 12 (80.0%)                 | 0.065   |
| Diabetes mellitus                        | 163 (46.4%)              | 102 (45.1%)             | 21 (77.8%)                 | 34 (41.0%)                | 6 (40.0%)                  | 0.007   |
| Hyperlipidemia                           | 197 (56.1%)              | 132 (58.4%)             | 20 (74.1%)                 | 37 (44.6%)                | 8 (53.3%)                  | 0.036   |
| Current smoking                          | 165 (47.0%)              | 113 (50.0%)             | 14 (51.9%)                 | 28 (33.7%)                | 10 (66.7%)                 | 0.026   |
| Family history of cardiovascular disease | 89 (25.4%)               | 64 (28.3%)              | 8 (29.6%)                  | 12 (14.5%)                | 5 (33.3%)                  | 0.048   |
| <b>Laboratory Findings</b>               |                          |                         |                            |                           |                            |         |
| High sensitivity CRP, mg/dL              | 0.5 ± 1.5                | 0.5 ± 1.7               | 0.5 ± 0.8                  | 0.5 ± 1.2                 | 0.5 ± 1.0                  | 0.996   |
| Serum creatinine, mg/dL                  | 1.0 ± 0.4                | 0.9 ± 0.3               | 1.3 ± 0.7                  | 0.9 ± 0.3                 | 1.8 ± 1.0                  | 0.002   |
| Estimated GFR, mL/min/1.73m <sup>2</sup> | 84.6 ± 25.9              | 89.0 ± 23.7             | 69.0 ± 23.1                | 83.9 ± 26.4               | 50.1 ± 25.4                | <0.001  |
| NT-proBNP, pg/mL                         | 646.1<br>(118.3, 2978.8) | 241.6<br>(77.9, 1534.0) | 3504.0<br>(1289.5, 7885.3) | 1822.0<br>(303.4, 4405.0) | 2665.0<br>(2030.5, 4222.0) | <0.001  |
| <b>Echocardiographic Findings</b>        |                          |                         |                            |                           |                            |         |
| Ejection fraction, %                     | 61.9 ± 7.9               | 62.4 ± 7.6              | 59.7 ± 6.4                 | 61.4 ± 9.0                | 61.5 ± 9.5                 | 0.234   |
| LVEDD, mm                                | 47.7 ± 5.2               | 48.3 ± 5.08             | 45.8 ± 3.8                 | 46.4 ± 5.8                | 49.2 ± 4.5                 | 0.004   |
| LVESD, mm                                | 29.3 ± 4.7               | 29.4 ± 4.84             | 28.8 ± 2.1                 | 28.9 ± 5.1                | 30.0 ± 4.5                 | 0.527   |
| Septal wall thickness, mm                | 9.7 (8.5, 11.0)          | 9.2 (8.5, 10.4)         | 10.3 (9.5, 11.2)           | 10.0 (8.8, 12.9)          | 11.0 (8.8, 11.9)           | 0.001   |
| Posterior wall thickness, mm             | 9.4 (8.2, 10.3)          | 9.00 (8.1, 10.0)        | 10.0 (9.6, 10.9)           | 10.0 (8.3, 11.7)          | 10.9 (10.0, 11.8)          | <0.001  |
| LA volume index, mL/m <sup>2</sup>       | 40.8 (31.1, 54.4)        | 37.7 (29.6, 48.0)       | 61.2 (49.9, 76.2)          | 43.4 (34.4, 59.0)         | 45.0 (41.6, 50.6)          | <0.001  |
| Left atrial enlargement*                 | 238 (70.4%)              | 139 (63.5%)             | 25 (96.2%)                 | 60 (76.9%)                | 14 (93.3%)                 | <0.001  |
| LVMI, g/m <sup>2</sup>                   | 110.7 ± 35.5             | 106.06 ± 31.32          | 104.80 ± 25.63             | 121.75 ± 42.90            | 130.55 ± 46.45             | 0.01    |
| Relative wall thickness                  | 0.41 ± 0.10              | 0.38 ± 0.07             | 0.44 ± 0.08                | 0.45 ± 0.14               | 0.46 ± 0.13                | <0.001  |
| Left ventricular hypertrophy†            | 69 (19.8%)               | 20 (8.9%)               | 8 (29.6%)                  | 35 (42.7%)                | 6 (40.0%)                  | <0.001  |
| E velocity, cm/s                         | 72.3 ± 22.4              | 69.2 ± 19.3             | 78.4 ± 24.1                | 76.8 ± 27.6               | 88.6 ± 25.7                | 0.017   |
| A velocity, cm/s                         | 61.3 ± 28.0              | 62.6 ± 25.3             | 37.1 ± 18.7                | 63.3 ± 33.1               | 71.6 ± 39.7                | <0.001  |
| e' velocity, cm/s                        | 6.4 ± 2.4                | 6.8 ± 2.2               | 6.9 ± 2.8                  | 5.5 ± 2.5                 | 5.5 ± 1.7                  | 0.001   |
| E/e'                                     | 11.0 (8.8, 14.2)         | 10.4 (8.3, 12.6)        | 12.6 (8.9, 15.6)           | 13.8 (9.1, 19.8)          | 14.2 (13.0, 19.7)          | <0.001  |
| Peak TR velocity, m/s                    | 2.4 ± 0.4                | 2.3 ± 0.3               | 2.5 ± 0.3                  | 2.5 ± 0.5                 | 2.5 ± 0.4                  | 0.001   |
| RV systolic pressure, mmHg               | 29.2 ± 8.5               | 26.8 ± 5.4              | 33.0 ± 8.5                 | 33.5 ± 11.7               | 33.7 ± 11.2                | <0.001  |

|                                         |               |               |               |               |               |        |
|-----------------------------------------|---------------|---------------|---------------|---------------|---------------|--------|
| <b>Interrogated Vessels</b>             |               |               |               |               |               | 0.024  |
| Left anterior descending artery         | 263 (74.9%)   | 157 (69.5%)   | 25 (92.6%)    | 69 (83.1%)    | 12 (80.0%)    |        |
| Left circumflex artery                  | 42 (12.0%)    | 32 (14.2%)    | 0 (0.0%)      | 9 (10.8%)     | 1 (6.7%)      |        |
| Right coronary artery                   | 46 (13.1%)    | 37 (16.4%)    | 2 (7.4%)      | 5 (6.0%)      | 2 (13.3%)     |        |
| <b>Coronary Angiographic Parameters</b> |               |               |               |               |               |        |
| Angiographic disease extent             |               |               |               |               |               | 0.003  |
| Insignificant stenosis                  | 173 (49.3%)   | 98 (43.4%)    | 24 (88.9%)    | 42 (50.6%)    | 9 (60.0%)     |        |
| 1-vessel disease                        | 64 (18.2%)    | 45 (19.9%)    | 1 (3.7%)      | 17 (20.5%)    | 1 (6.7%)      |        |
| 2-vessel disease                        | 69 (19.7%)    | 52 (23.0%)    | 1 (3.7%)      | 13 (15.7%)    | 3 (20.0%)     |        |
| 3-vessel disease                        | 43 (12.3%)    | 31 (13.7%)    | 1 (3.7%)      | 9 (10.8%)     | 2 (13.3%)     |        |
| Reference vessel diameter, mm           | 3.0 ± 0.6     | 3.1 ± 0.6     | 2.9 ± 0.5     | 2.9 ± 0.5     | 3.0 ± 0.7     | 0.103  |
| Diameter stenosis, %                    | 37.2 ± 22.1   | 38.6 ± 21.7   | 20.8 ± 18.1   | 39.7 ± 22.5   | 33.2 ± 24.3   | 0.004  |
| Lesion length, mm                       | 13.3 ± 9.8    | 13.5 ± 10.1   | 9.6 ± 7.5     | 14.5 ± 10.1   | 14.2 ± 5.6    | 0.203  |
| SYNTAX score                            | 5.5 ± 7.1     | 6.1 ± 7.3     | 1.2 ± 3.6     | 5.3 ± 6.9     | 4.6 ± 6.6     | <0.001 |
| <b>Coronary Physiologic Parameters</b>  |               |               |               |               |               |        |
| Interrogated Vessels                    |               |               |               |               |               | 0.024  |
| - Left anterior descending artery       | 263 (74.9%)   | 157 (69.5%)   | 25 (92.6%)    | 69 (83.1%)    | 12 (80.0%)    |        |
| - Left circumflex artery                | 42 (12.0%)    | 32 (14.2%)    | 0 (0.0%)      | 9 (10.8%)     | 1 (6.7%)      |        |
| - Right coronary artery                 | 46 (13.1%)    | 37 (16.4%)    | 2 (7.4%)      | 5 (6.0%)      | 2 (13.3%)     |        |
| Resting Pd/Pa                           | 0.95 ± 0.04   | 0.96 ± 0.04   | 0.95 ± 0.03   | 0.93 ± 0.04   | 0.94 ± 0.04   | <0.001 |
| FFR                                     | 0.89 ± 0.05   | 0.89 ± 0.05   | 0.91 ± 0.04   | 0.89 ± 0.05   | 0.89 ± 0.05   | 0.092  |
| Resting mean transit time, s            | 0.90 ± 0.49   | 1.02 ± 0.50   | 0.73 ± 0.31   | 0.66 ± 0.40   | 0.61 ± 0.37   | <0.001 |
| Hyperemic mean transit time, s          | 0.33 ± 0.23   | 0.28 ± 0.18   | 0.24 ± 0.14   | 0.47 ± 0.31   | 0.42 ± 0.27   | <0.001 |
| CFR                                     | 3.20 ± 1.72   | 3.97 ± 1.57   | 3.22 ± 0.84   | 1.42 ± 0.41   | 1.49 ± 0.29   | <0.001 |
| IMR, Unit                               | 23.36 ± 15.29 | 20.53 ± 12.15 | 18.51 ± 11.19 | 31.65 ± 20.27 | 28.88 ± 14.73 | <0.001 |

Data are presented as mean ± standard deviation and median with interquartile range or n (%).

\* Defined as LA volume index >34 ml/m<sup>2</sup>.

† Defined as LVMI ≥115/95 g/m<sup>2</sup> (male/female) and relative wall thickness >0.42.

Abbreviations: CFR, coronary flow reserve; CKD, chronic kidney disease; CRP, C-reactive protein; FFR, fractional flow reserve; GFR, glomerular filtration rate; IMR, index of microcirculatory resistance; LA, left atrium; LVEDD, left ventricular end diastolic dimension; LVESD, left ventricular end systolic dimension; LVMI, left ventricular mass index; NT-proBNP, N-terminal pro-B-type natriuretic peptide; Pa, aortic pressure; Pd, distal pressure; RV, right ventricle; SYNTAX, Synergy Between PCI With Taxus and Cardiac Surgery; TR, tricuspid regurgitation.

**Table S3. Multivariable Linear Regression Model of Predictors of CFR or IMR**

| Variable                                    | Univariable analysis     |         | Multivariable analysis*  |         |
|---------------------------------------------|--------------------------|---------|--------------------------|---------|
|                                             | $\beta$ (95% CI)         | P value | $\beta$ (95% CI)         | P value |
| <b>Coronary Flow Reserve</b>                |                          |         |                          |         |
| Glomerular filtration rate                  | 0.016 (0.003 - 0.028)    | 0.017   | 0.016 (0.000 - 0.031)    | 0.045   |
| Age                                         | -0.017 (-0.047 - 0.014)  | 0.287   | -0.008 (-0.039 - 0.024)  | 0.622   |
| Diabetes mellitus                           | 0.446 (-0.257 - 1.149)   | 0.207   | 0.418 (-0.270 - 1.105)   | 0.226   |
| Body mass index                             | -0.027 (-0.123 - 0.069)  | 0.568   | 0.020 (-0.083 - 0.123)   | 0.695   |
| <b>Index of Microcirculatory Resistance</b> |                          |         |                          |         |
| Glomerular filtration rate                  | -0.184 (-0.342 - -0.026) | 0.023   | -0.142 (-0.330 - 0.047)  | 0.137   |
| Age                                         | 0.291 (-0.083 - 0.666)   | 0.124   | -0.199 (-0.189 - 0.588)  | 0.305   |
| Diabetes mellitus                           | -4.381 (-13.080 - 4.318) | 0.315   | -4.653 (-13.150 - 3.841) | 0.274   |
| Body mass index                             | 0.657 (-0.510 - 1.824)   | 0.262   | 0.188 (-1.088 - 1.464)   | 0.767   |

\* Adjusted covariables were age, diabetes mellitus and body mass index.

Abbreviations: CFR, coronary flow reserve; CI, confidence interval; HR, hazard ratio; IMR, index of microcirculatory resistance.

## Supplementary Figures

### Supplementary Figure 1. Study Flow

Study flow is shown. Among the registered population, patients with LVEF <40%, functionally significant epicardial coronary artery stenosis (FFR  $\leq$ 0.80), or dialysis were excluded from the current analysis. A total of 351 patients were finally selected for the current analysis and grouped according to the presence of CKD and depressed CFR ( $\leq$ 2.0).

Abbreviations: CFR, coronary flow reserve; CKD, chronic kidney disease, DIAST-CMD, Prognostic Impact of Cardiac Diastolic Function and Coronary Microvascular Function; FFR, fractional flow reserve; LVEF, left ventricular ejection fraction.

Supplementary Figure 1. Study Flow

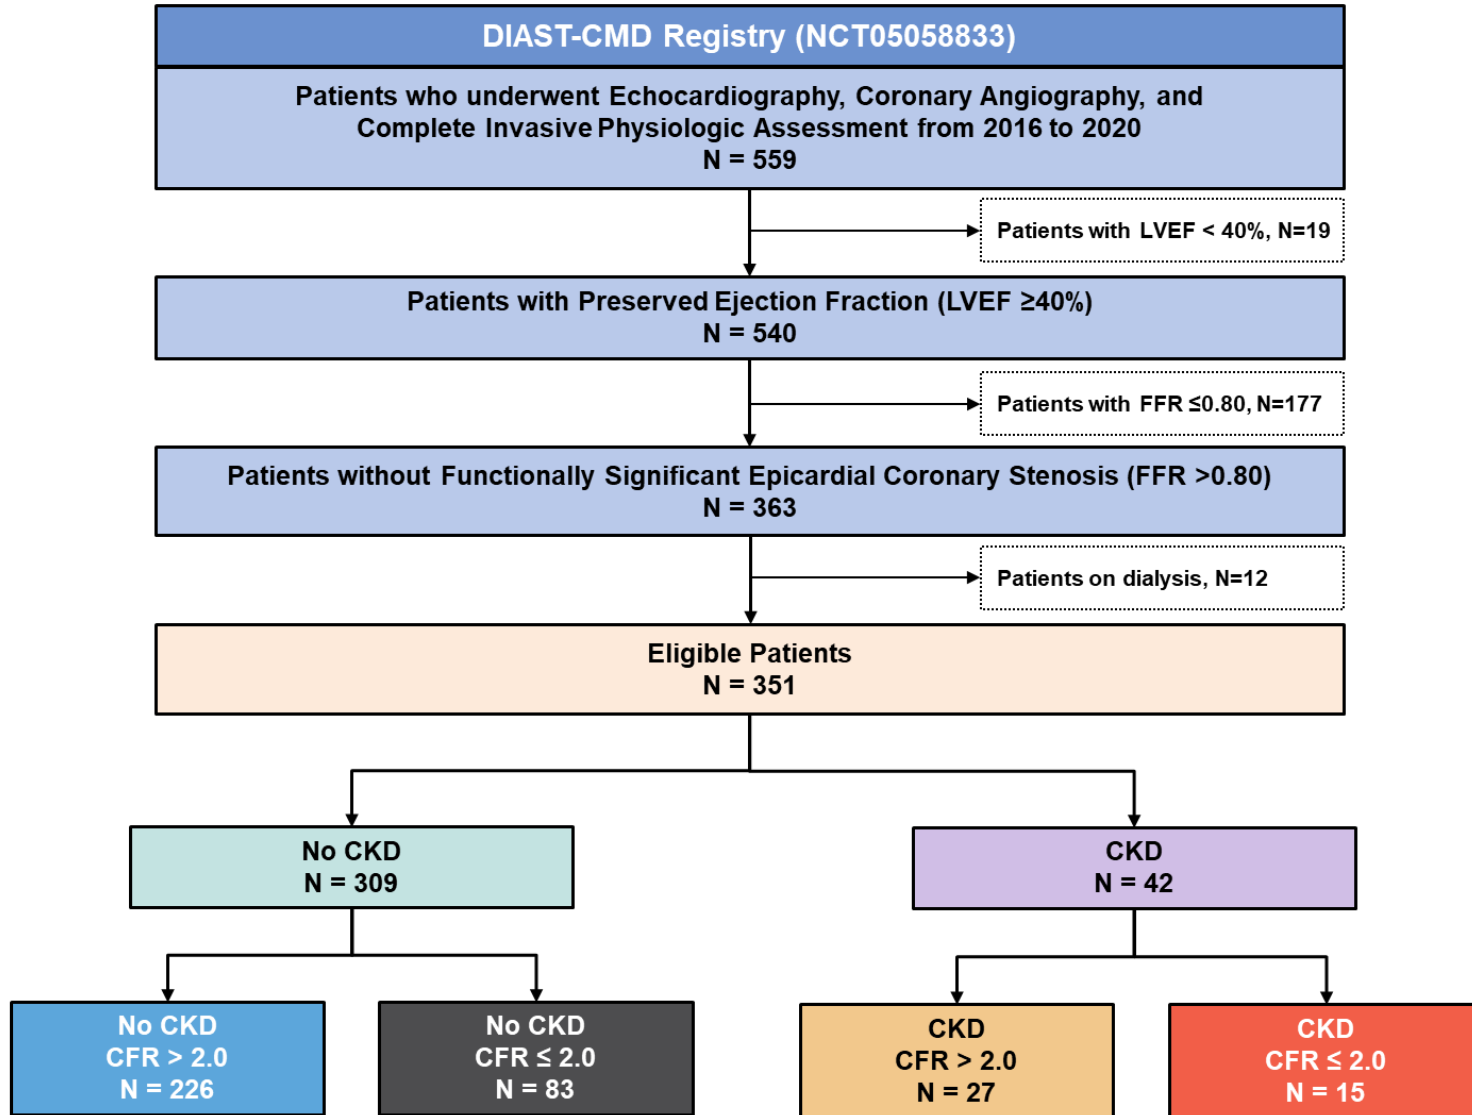

**Modified STROBE Statement—checklist of items that should be included in reports of observational studies (Cohort/Cross-sectional and case-control studies)**

|                           | <b>Item No</b> | <b>Recommendation</b>                                                                                                                                                                                                                                                                                                                                                                                                                                                              | <b>Page number</b> |
|---------------------------|----------------|------------------------------------------------------------------------------------------------------------------------------------------------------------------------------------------------------------------------------------------------------------------------------------------------------------------------------------------------------------------------------------------------------------------------------------------------------------------------------------|--------------------|
| <b>Title and abstract</b> | 1              | (a) Indicate the study's design with a commonly used term in the title or the abstract                                                                                                                                                                                                                                                                                                                                                                                             | 1-4                |
|                           |                | (b) Provide in the abstract an informative and balanced summary of what was done and what was found                                                                                                                                                                                                                                                                                                                                                                                | 3-4                |
| <b>Introduction</b>       |                |                                                                                                                                                                                                                                                                                                                                                                                                                                                                                    |                    |
| Background/rationale      | 2              | Explain the scientific background and rationale for the investigation being reported                                                                                                                                                                                                                                                                                                                                                                                               | 6                  |
| Objectives                | 3              | State specific objectives, including any prespecified hypotheses                                                                                                                                                                                                                                                                                                                                                                                                                   | 6-7                |
| <b>Methods</b>            |                |                                                                                                                                                                                                                                                                                                                                                                                                                                                                                    |                    |
| Study design              | 4              | Present key elements of study design early in the paper                                                                                                                                                                                                                                                                                                                                                                                                                            | 7                  |
| Setting                   | 5              | Describe the setting, locations, and relevant dates, including periods of recruitment, exposure, follow-up, and data collection                                                                                                                                                                                                                                                                                                                                                    | 7-8                |
| Participants              | 6              | <p>(a) <i>Cohort study</i>—Give the eligibility criteria, and the sources and methods of selection of participants. Describe methods of follow-up</p> <p><i>Case-control study</i>—Give the eligibility criteria, and the sources and methods of case ascertainment and control selection. Give the rationale for the choice of cases and controls</p> <p><i>Cross-sectional study</i>—Give the eligibility criteria, and the sources and methods of selection of participants</p> | 7-9                |



|                              |    |                                                                                                                                          |      |
|------------------------------|----|------------------------------------------------------------------------------------------------------------------------------------------|------|
| Variables                    | 7  | Clearly define all outcomes, exposures, predictors, potential confounders, and effect modifiers. Give diagnostic criteria, if applicable | 8-9  |
| Data sources/<br>measurement | 8* | For each variable of interest, give sources of data and details of methods of assessment (measurement).                                  | 7-9  |
| Bias                         | 9  | Describe any efforts to address potential sources of bias                                                                                | 9-10 |
| Study size                   | 10 | Explain how the study size was arrived at (if applicable)                                                                                | NA   |
| Quantitative variables       | 11 | Explain how quantitative variables were handled in the analyses. If applicable, describe which groupings were chosen and why             | 9-10 |
| Statistical methods          | 12 | (a) Describe all statistical methods, including those used to control for confounding                                                    | 9-10 |
|                              |    | (b) Describe any methods used to examine subgroups and interactions                                                                      | 9-10 |
|                              |    | (c) Explain how missing data were addressed                                                                                              | 9-10 |
|                              |    | (d) <i>Cohort study</i> —If applicable, explain how loss to follow-up was addressed                                                      | 7-10 |
|                              |    | <i>Case-control study</i> —If applicable, explain how matching of cases and controls was addressed                                       |      |
|                              |    | <i>Cross-sectional study</i> —If applicable, describe analytical methods taking account of sampling strategy                             |      |
|                              |    | (e) Describe any sensitivity analyses                                                                                                    | 10   |
| <b>Results</b>               |    |                                                                                                                                          |      |
| Participants                 |    | (a) Report numbers of individuals at each stage of study—eg numbers potentially eligible, examined for                                   | 11   |

|                   |     |                                                                                                                                                                                                              |            |
|-------------------|-----|--------------------------------------------------------------------------------------------------------------------------------------------------------------------------------------------------------------|------------|
|                   | 13* | eligibility, confirmed eligible, included in the study, completing follow-up, and analyzed                                                                                                                   |            |
|                   |     | (c) <b>Use of a flow diagram</b>                                                                                                                                                                             | S-Figure 1 |
| Descriptive data  | 14* | (a) Give characteristics of study participants (eg demographic, clinical, social) and information on exposures and potential confounders                                                                     | 11         |
|                   |     | (b) Indicate number of participants with missing data for each variable of interest                                                                                                                          | 11         |
|                   |     | (c) <i>Cohort study</i> —Summarise follow-up time (eg, average and total amount)                                                                                                                             | 12         |
| Outcome data      | 15* | <i>Cohort study</i> —Report numbers of outcome events or summary measures over time                                                                                                                          | 12         |
|                   |     | <i>Case-control study</i> —Report numbers in each exposure category, or summary measures of exposure                                                                                                         | NA         |
|                   |     | <i>Cross-sectional study</i> —Report numbers of outcome events or summary measures                                                                                                                           | NA         |
| Main results      | 16  | (a) Give unadjusted estimates and, if applicable, confounder-adjusted estimates and their precision (eg, 95% confidence interval). Make clear which confounders were adjusted for and why they were included | 11-12      |
| Other analyses    | 17  | Report other analyses done—eg analyses of subgroups and interactions, and sensitivity analyses                                                                                                               | 11         |
| <b>Discussion</b> |     |                                                                                                                                                                                                              |            |
| Key results       |     | Summarise key results with reference to study                                                                                                                                                                | 13         |

18 objectives

---

|                  |    |                                                                                                                          |       |
|------------------|----|--------------------------------------------------------------------------------------------------------------------------|-------|
| Limitations      |    | Discuss limitations of the study, taking into account                                                                    | 16-17 |
|                  | 19 | sources of potential bias or imprecision. Discuss both direction and magnitude of any potential bias                     |       |
| Interpretation   |    | Give a cautious overall interpretation of results                                                                        | 13-15 |
|                  | 20 | considering objectives, limitations, multiplicity of analyses, results from similar studies, and other relevant evidence |       |
| Generalisability | 21 | Discuss the generalisability (external validity) of the                                                                  | 16    |
|                  |    | study results                                                                                                            |       |

---

\*Give information separately for cases and controls in case-control studies and, if applicable, for exposed and unexposed groups in cohort and cross-sectional studies.

**Note:** An Explanation and Elaboration article discusses each checklist item and gives methodological background and published examples of transparent reporting. The STROBE checklist is best used in conjunction with this article (freely available on the Web sites of PLoS Medicine at <http://www.plosmedicine.org/>, Annals of Internal Medicine at <http://www.annals.org/>, and Epidemiology at <http://www.epidem.com/>). Information on the STROBE Initiative is available at [www.strobe-statement.org](http://www.strobe-statement.org).
